# Supplementary material for: Comprehensive investigation of alternative splicing and development of a prognostic risk score for prostate cancer based on six-gene signatures
Source: PubMed Central journal article supplement (PMC6775697; doi:10.7150/jca.31725), 2019-09-07
Supplement: jcav10p5585s1.pdf [file jcav10p5585s1.pdf]

**Supplementary Figure 1** Kaplan-Meier curves of top10 OS associated AS events in PCa. a to g,  
Kaplan-Meier curves of top10 OS associated AA, AD, AP, AT, ES, ME and RI events.

**Supplementary Figure 2** Kaplan-Meier curves of top10 RFS associated AS events in PCa. a to g,  
Kaplan-Meier curves of top10 RFS associated AA, AD, AP, AT, ES, ME and RI events.

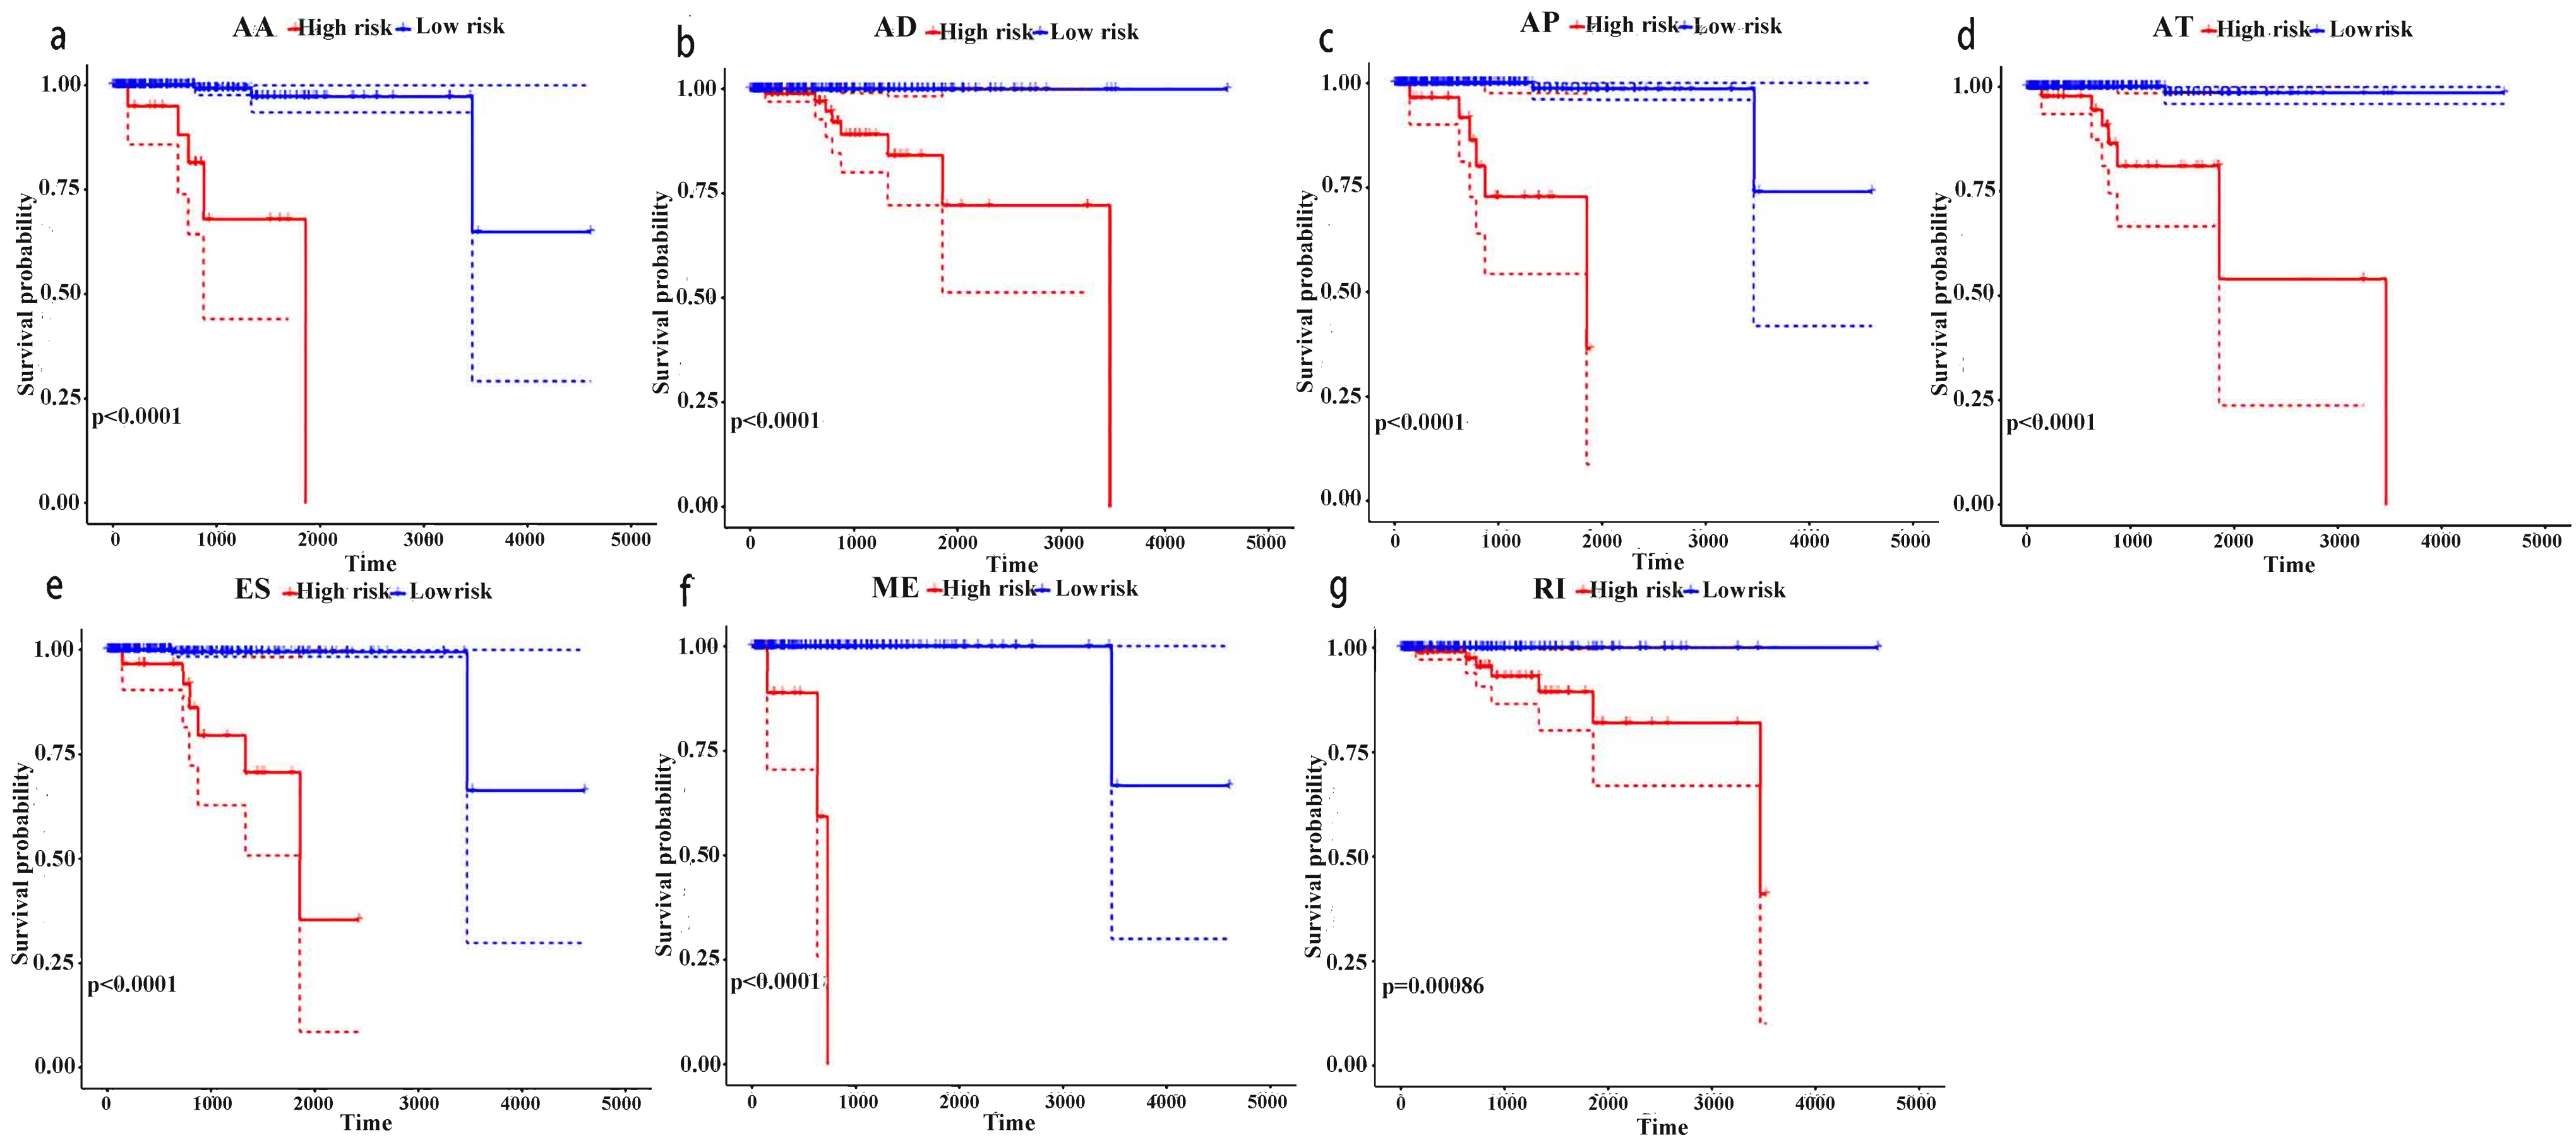

**Fig. S1 Kaplan-Meier analysis of top10 OS associated AS events in PCa.**

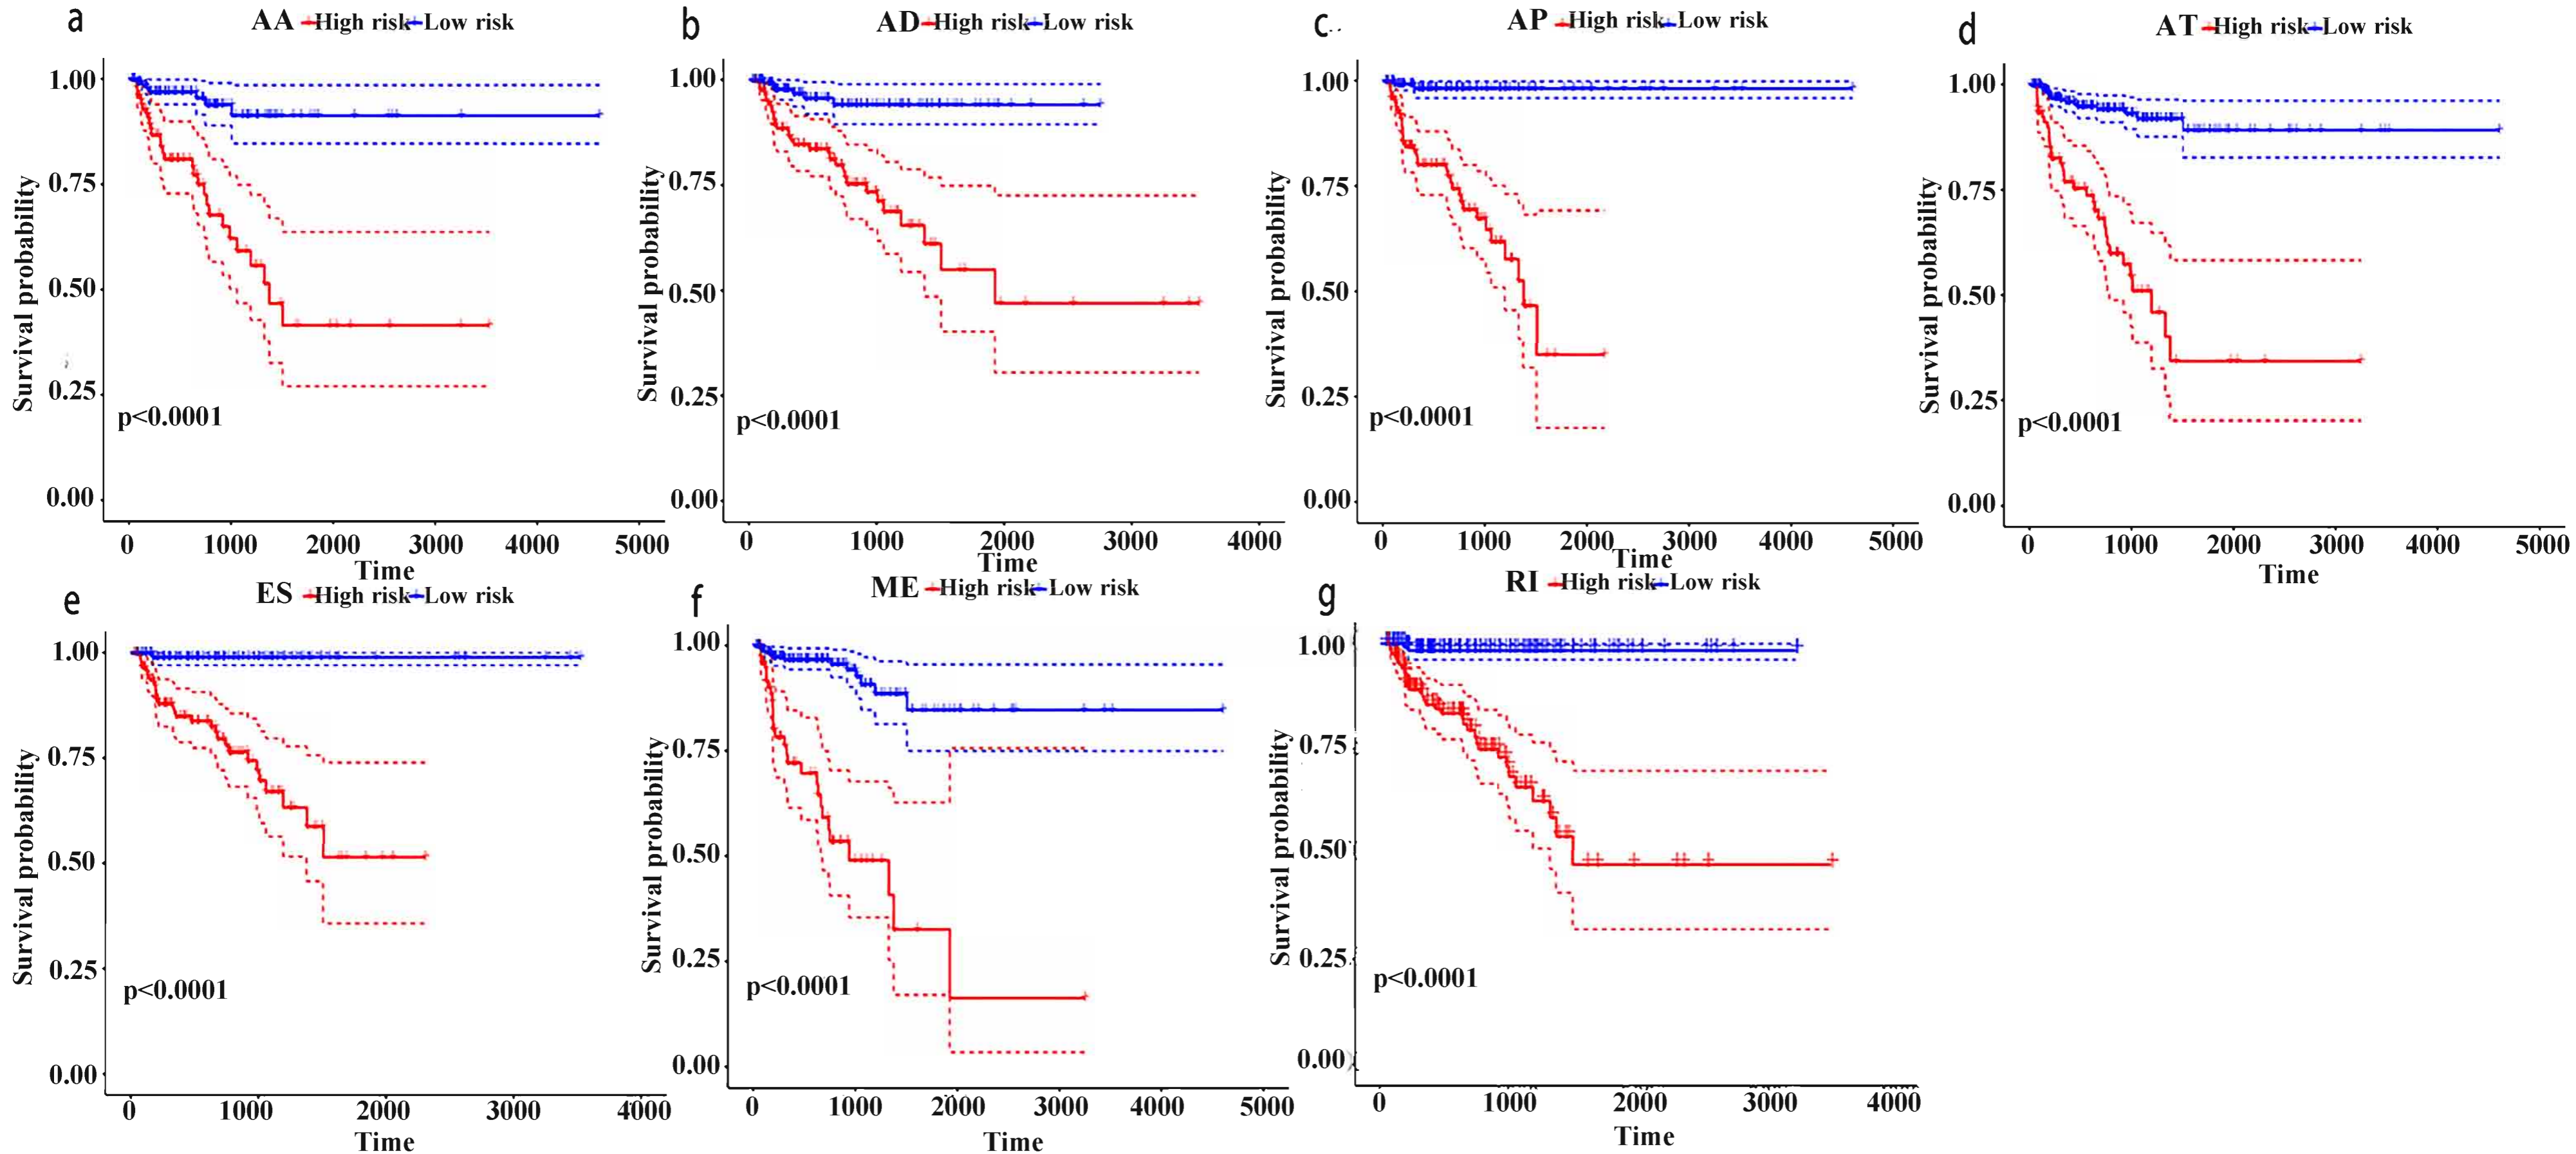

**Fig. S2 Kaplan-Meier analysis of top10 RFS associated AS events in PCa.**
